# Supplementary material for: Evaluation of external contamination on the vial surfaces of some hazardous drugs that commonly used in Chinese hospitals and comparison between environmental contamination generated during robotic compounding by IV: Dispensing robot vs. manual compounding in biological safety cabinet
Source: PubMed Central journal article supplement — J Oncol Pharm Pract. 2021 Jun 24;28(7):1487–98. doi: 10.1177/10781552211023571 (PMC9465550; doi:10.1177/10781552211023571), 2021-06-24
Supplement: sj-pdf-1-opp-10.1177_10781552211023571.pdf [file sj-pdf-1-opp-10.1177_10781552211023571.pdf]

Supplemental Table 1. Contamination measured in WEINAS robotic system. — Raw data

| WEINAS        | Cyclophosphamide      |       |       | Fluorouracil          |       |       | Gemcitabine           |       |       |
|---------------|-----------------------|-------|-------|-----------------------|-------|-------|-----------------------|-------|-------|
|               | (ng/cm <sup>2</sup> ) |       |       | (ng/cm <sup>2</sup> ) |       |       | (ng/cm <sup>2</sup> ) |       |       |
|               | Day1                  | Day2  | Day3  | Day1                  | Day2  | Day3  | Day1                  | Day2  | Day3  |
| Clamping arm* | 35400                 | 31700 | 28700 | 765                   | 648   | 627   | 670                   | 633   | 523   |
| Disc          | 40.76                 | 35.67 | 34.24 | 0.23                  | 0.20  | 0.18  | 10.83                 | 8.04  | 7.73  |
| Waste inlet   | 44.70                 | 35.79 | 29.74 | 10.96                 | 10.26 | 9.57  | 13.29                 | 12.26 | 11.70 |
| A(inside)     | 0.71                  | 0.59  | 0.51  | 0.058                 | 0.045 | 0.044 | 0.11                  | 0.09  | 0.06  |
| B(inside)     | 0.34                  | 0.32  | 0.30  | 0.01                  | 0.009 | 0.008 | 0.011                 | 0.01  | 0.008 |
| C(inside)     | 0.39                  | 0.26  | 0.02  | 0.03                  | 0.029 | 0.026 | 0.054                 | 0.049 | 0.044 |
| D(inside)     | 0.45                  | 0.38  | 0.37  | 0.027                 | 0.024 | 0.02  | 0.034                 | 0.029 | 0.025 |
| E(inside)     | 0.53                  | 0.44  | 0.34  | 0.091                 | 0.087 | 0.084 | 0.037                 | 0.033 | 0.027 |
| F(outside)    | 0.16                  | 0.11  | 0.11  | 0.028                 | 0.023 | 0.021 | 0.015                 | 0.01  | 0.011 |
| Gloves        | 14.67                 | 14.40 | 13.00 | 2.25                  | 2.15  | 2.33  | 0.64                  | 0.61  | 0.65  |
| Infusion bags | 7.20                  | 13.20 | 11.45 | 3.94                  | 3.19  | 3.28  | 1.92                  | 2.31  | 3.60  |
