# Supplementary material for: Evaluation of external contamination on the vial surfaces of some hazardous drugs that commonly used in Chinese hospitals and comparison between environmental contamination generated during robotic compounding by IV: Dispensing robot vs. manual compounding in biological safety cabinet
Source: PubMed Central journal article supplement — J Oncol Pharm Pract. 2021 Jun 24;28(7):1487–98. doi: 10.1177/10781552211023571 (PMC9465550; doi:10.1177/10781552211023571), 2021-06-24
Supplement: sj-pdf-2-opp-10.1177_10781552211023571.pdf [file sj-pdf-2-opp-10.1177_10781552211023571.pdf]

Supplemental Table 2. Contamination measured in BSC. — Raw data

| BSC           | Cyclophosphamide<br>(ng/cm <sup>2</sup> ) |        |         | Fluorouracil<br>(ng/cm <sup>2</sup> ) |       |       | Gemcitabine<br>(ng/cm <sup>2</sup> ) |       |       |
|---------------|-------------------------------------------|--------|---------|---------------------------------------|-------|-------|--------------------------------------|-------|-------|
|               | Day1                                      | Day2   | Day3    | Day1                                  | Day2  | Day3  | Day1                                 | Day2  | Day3  |
|               | Pad                                       | 103.25 | 103.00  | 103.75                                | 5.16  | 5.27  | 5.30                                 | 1.44  | 1.37  |
| A (Internal)  | 1.38                                      | 1.24   | 1.20    | 2.98                                  | 2.63  | 2.78  | 0.10                                 | 0.093 | 0.086 |
| B (Internal)  | 0.12                                      | 0.11   | 0.11    | 0.035                                 | 0.033 | 0.028 | 0.012                                | 0.01  | 0.01  |
| C (Internal)  | 1.20                                      | 1.14   | 1.11    | 0.35                                  | 0.28  | 0.23  | 0.082                                | 0.073 | 0.071 |
| D (Internal)  | 0.71                                      | 0.62   | 0.60    | 0.41                                  | 0.36  | 0.30  | 0.061                                | 0.059 | 0.057 |
| E (Internal)  | 0.17                                      | 0.13   | 0.10    | 0.26                                  | 0.25  | 0.21  | 0.045                                | 0.043 | 0.043 |
| F (External)  | 0.61                                      | 0.59   | 0.54    | 0.14                                  | 0.13  | 0.11  | 0.072                                | 0.069 | 0.065 |
| Gloves        | 29.33                                     | 30.50  | 30.30   | 9.41                                  | 9.31  | 9.93  | 8.38                                 | 8.82  | 8.47  |
| Infusion bags | 131.25                                    | 38.40  | 101.625 | 5.93                                  | 8.50  | 8.125 | 79.33                                | 66.50 | 41.00 |
