# Supplementary material for: Evaluation of external contamination on the vial surfaces of some hazardous drugs that commonly used in Chinese hospitals and comparison between environmental contamination generated during robotic compounding by IV: Dispensing robot vs. manual compounding in biological safety cabinet
Source: PubMed Central journal article supplement — J Oncol Pharm Pract. 2021 Jun 24;28(7):1487–98. doi: 10.1177/10781552211023571 (PMC9465550; doi:10.1177/10781552211023571), 2021-06-24
Supplement: sj-pdf-3-opp-10.1177_10781552211023571.pdf [file sj-pdf-3-opp-10.1177_10781552211023571.pdf]

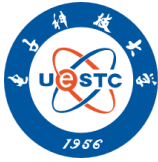

电子科技大学  
University of Electronic Science and Technology of China

**Junfeng Yan**  
**Professor**

School of Medicine,  
Univ. of Electronic Science and Technology of China  
Dept. of Pharmacy  
Sichuan Academy of Medical Sciences &  
Sichuan Provincial People's Hospital  
Chengdu 610072, China  
Email: Yanjunfeng@uestc.edu.cn

April 16, 2021

Prof. Alexandre Chan  
Journal of Oncology Pharmacy Practice

Dear Professor Chan

I would like express our sincerely gratitude to you for handing our manuscript (The manuscript ID is JOPP-20-0578.R1) and giving us the opportunity to improve and submit the revised version of our manuscript. I greatly appreciate the two reviewers for spending their precious time reviewing our manuscript. Their comments are all valuable and very helpful for revising and improving our paper, as well as the important guiding significance to our researches. We have studied the comments carefully and have addressed all the questions of the reviewers, which we hope meet with approval. Revised portion are marked in yellow in the revised manuscript.

And I greatly appreciate your consideration and support and look forward to the outcome of your assessment.

Sincerely,

*Junfeng Yan*
